# Supplementary material for: Fabrication of poly (quinine- co -itaconic acid) incorporated reduced graphene oxide nanocomposite and its application for electrochemical sensing and photocatalysis of hydroquinone
Source: Royal Society of Chemistry journal article supplement (doi:10.1039/d4ra06415a), 2024-01-01
Supplement: d4ra06415a1.pdf [file d4ra06415a1.pdf]

## Supplementary Information

### Fabrication of Poly (Quinine-co-Itaconic Acid) incorporated Reduced Graphene Oxide Nanocomposite and its Application for Electrochemical Sensing and Photocatalysis of Hydroquinone

Sehrish Qazi<sup>1</sup>, Huma Shaikh<sup>1</sup>, Amber R. Solangi<sup>1,\*</sup>, Nadir Hussain Khand<sup>1</sup>, Shahbaz Ali Mallah<sup>1</sup>,  
Mehrunnisa Koondhar<sup>1</sup>

<sup>1</sup>National Centre of Excellence in Analytical Chemistry, University of Sindh, Jamshoro-76080,  
Sindh-Pakistan

#### S1. EDX Analysis

Energy dispersive x-ray spectroscopy analysis was performed to determine the elemental composition of synthesized material. The EDX spectrum of GO is shown in figure S1(A) which shows two characteristic peaks i.e., carbon and oxygen with weight percentages of 70.16 % and 29.84 %, respectively. These results confirmed that GO has been successfully synthesized <sup>1, 2</sup>. The EDX spectrum of quinine Int. GO composite (figure S1B) shows similar peaks along with one new peak of nitrogen with weight percentage of 18.55 %. However, the weight percentage of oxygen is increased 38.06 % and the weight percentage of carbon is decreased to 43.39%. These results confirmed the intercalation of quinine into the layers of graphene oxide <sup>3</sup>. The EDX spectra of poly(quinine-co-itaconic acid)@GO composite (figure S1C) shows similar elements as quinine Int. GO; however, the weight percentage of oxygen is increase to 41.17 % due to copolymerization of itaconic acid with Quinine Int. GO <sup>4</sup>.

23

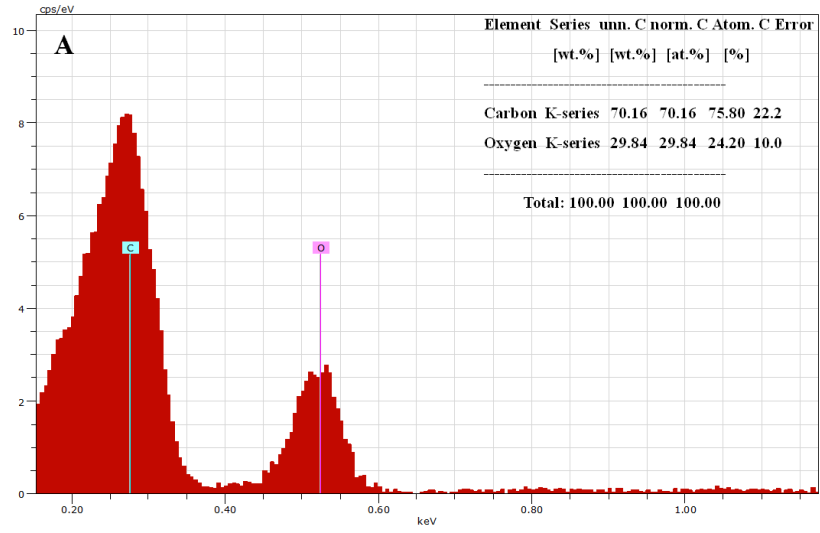

24

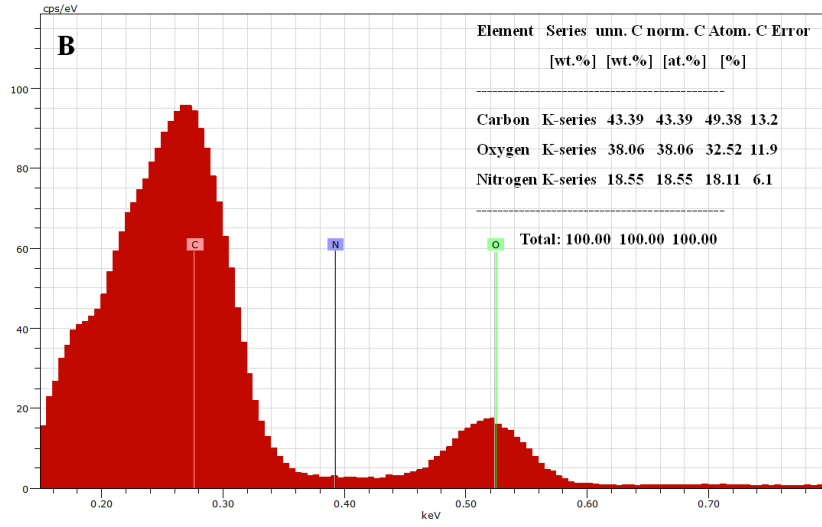

25

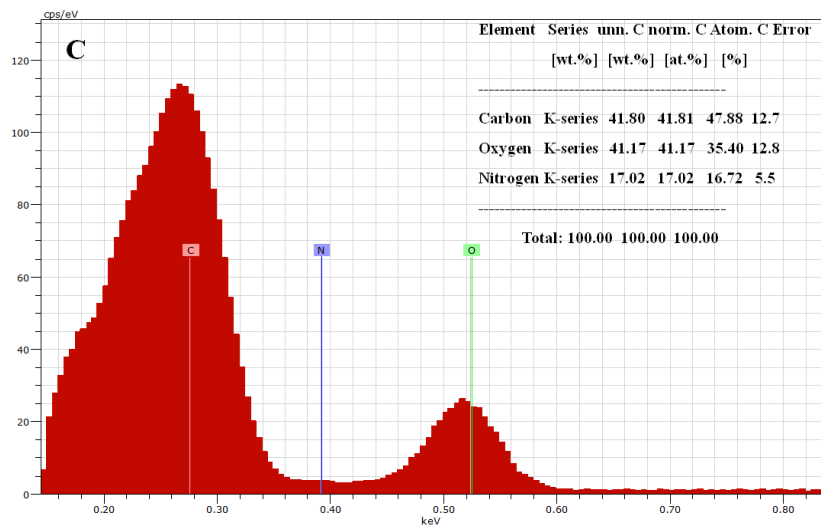

26

27 Figure S1: EDX spectra of (A) GO, (B) Quinine Int. GO composite and (C) Poly(quinine-co-  
28 itaconic acid)@rGO

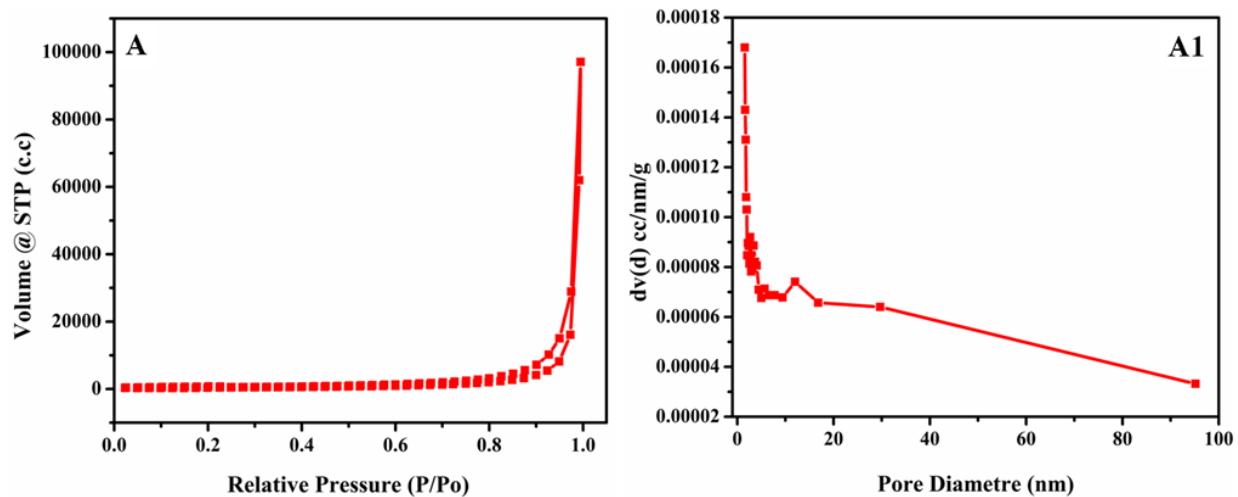

29  
30

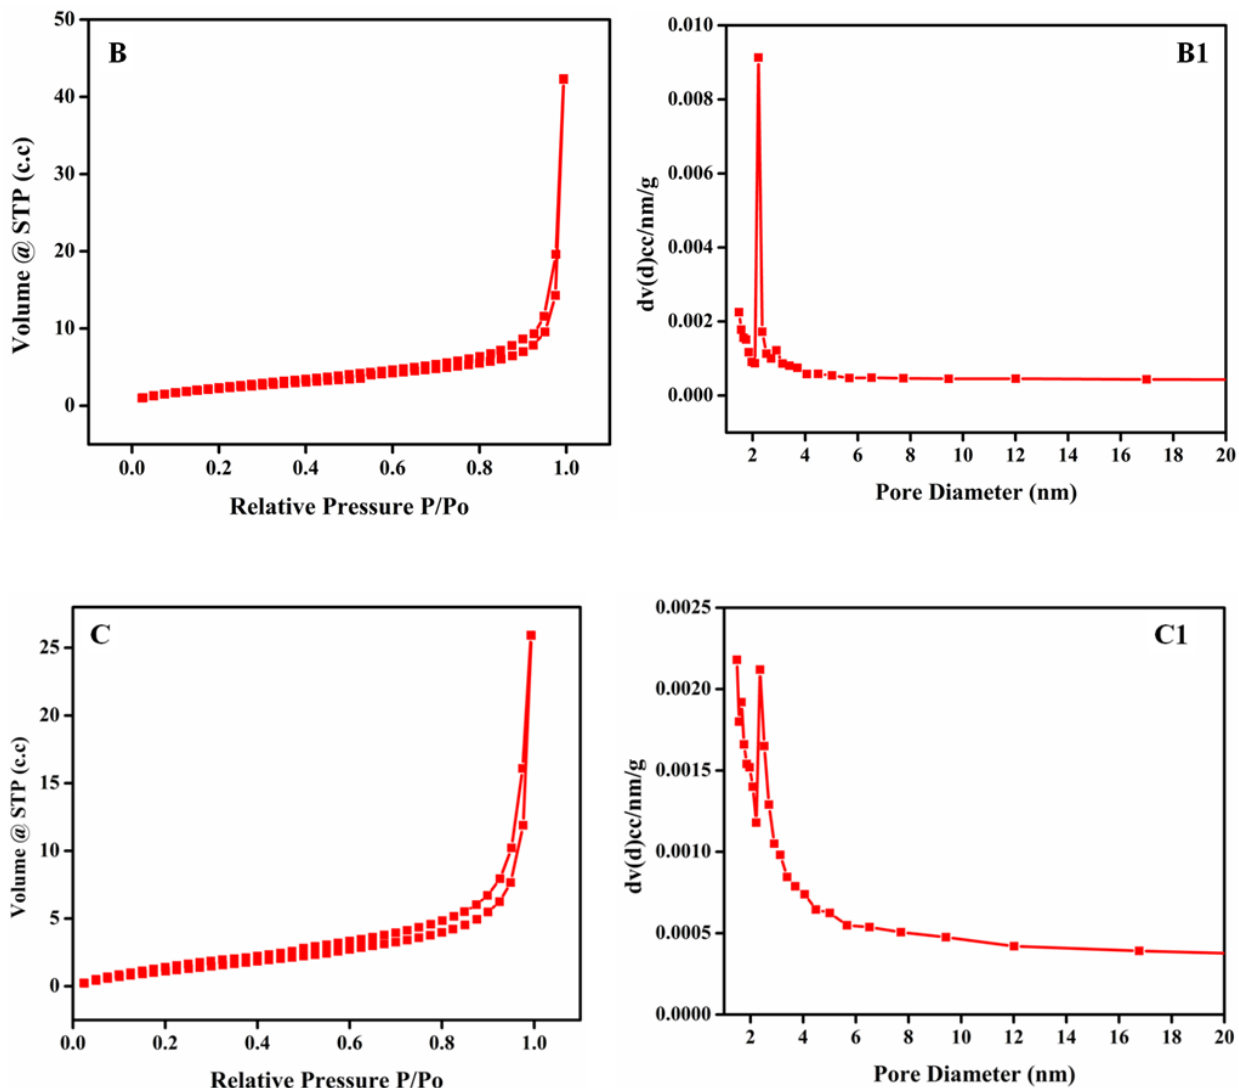

31  
32

33  
34 Figure S2: BET and BJH adsorption Isotherms of Graphene oxide (A, A1), Quinine Int. GO  
35 composite (B, B1), Poly(quinine-co-itaconic acid)@GO composite (C, C1)

## 36 S2. Surface Charge Analysis

37 The zeta potential was used to investigate the net surface charge of the material. The zeta  
38 potential charge distribution of GO i.e. -46.5 mV (figure S3A) due to oxygenated moieties of GO  
39 <sup>5</sup>. While, figure S3 (B) and (C) revealed the zeta potential of Quinine Int. GO composite and  
40 Poly(quinine-co-itaconic acid)@rGO composite is -27.0 mV and -17.6 mV. The material which  
41 has zeta potential value higher than  $\pm 25$  mV contains excellent material stability reported by  
42 Sztorch et. al.<sup>6</sup>. All composites have negative surface charge demonstrating that the materials are  
43 extremely robust and resistant to the agglomeration of sheets. Here, it is important to highlight

44 that the zeta potential of both Quinine Int. GO composite and Poly(quinine-co-itaconic  
45 acid)@rGO composite were increased due to the introduction of Quinine via intercalation and  
46 then copolymerization of Quinine Int. GO composite with itaconic acid <sup>7</sup>.

47

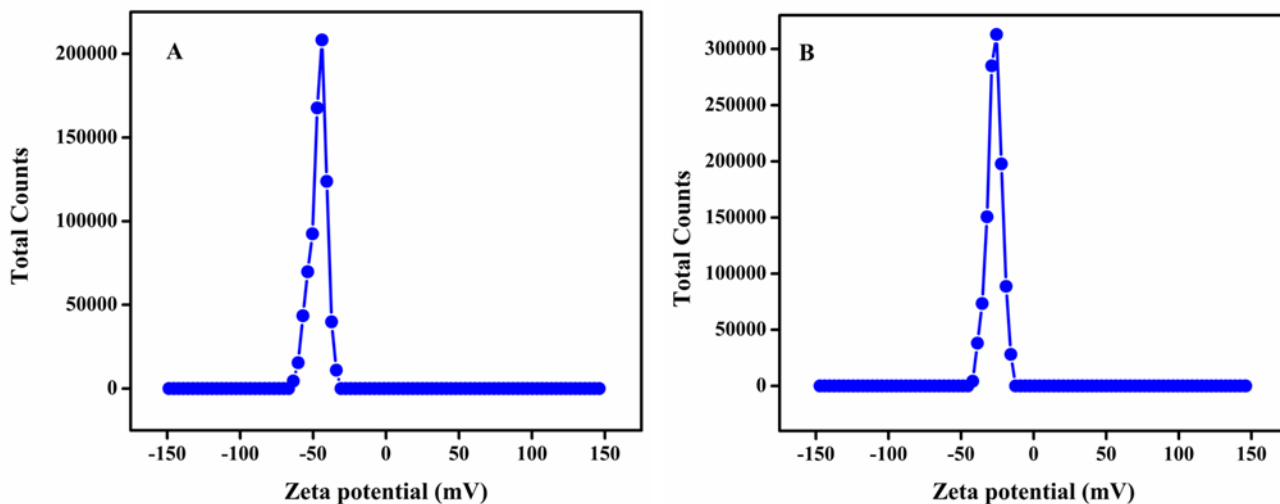

48

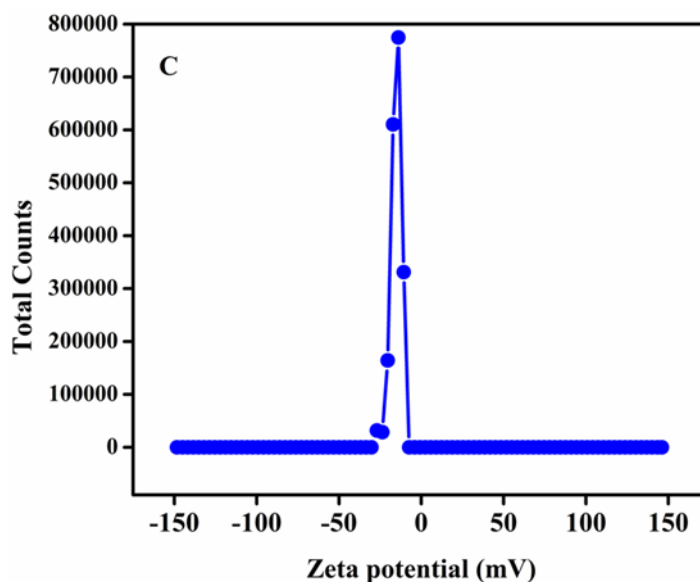

49

50

51 Figure S3: Zeta Potential of (A) GO (B) Quinine Int. GO composite (C) Poly(quinine-co-itaconic  
52 acid)@rGO composite

### 53 S3. Determination of energy bandgap

54 The band gap energy of the catalysts was examined by UV-Vis spectrophotometer (figure S4).

55 To calculate the band gap of Poly(quinine-co-itaconic acid)@rGO composite the following  
56 equation was used.

57 
$$E_{bg} = \frac{1240}{\lambda}$$
 (2)

58 Where  $E_g$  represents band gap energy <sup>8</sup>. The graphene oxide band gap was 4.3 eV which is  
 59 almost equal to the value given by zheng's works <sup>9</sup>. While the band gap of Quinine Int:GO was  
 60 4.8 eV and Poly(quinine-co-itaconic acid)@rGO composite was 4.1 eV. The slight decrease in  
 61 band gap energy of poly(quinine-co-itaconic acid)@rGO composite due to the formation of sub-  
 62 band level between valence band and conduction band formed due to coating of poly(quinine-co-  
 63 itaconic acid) at the surface of GO <sup>10</sup>. The reduced band gap energy of poly(quinine-co-itaconic  
 64 acid)@rGO composite indicates the improvement of photocatalytic activity as well as electrical  
 65 conductivity due to fast electron transfer, which facilitates electrochemical sensing and  
 66 photocatalytic degradation <sup>11, 12</sup>.

67

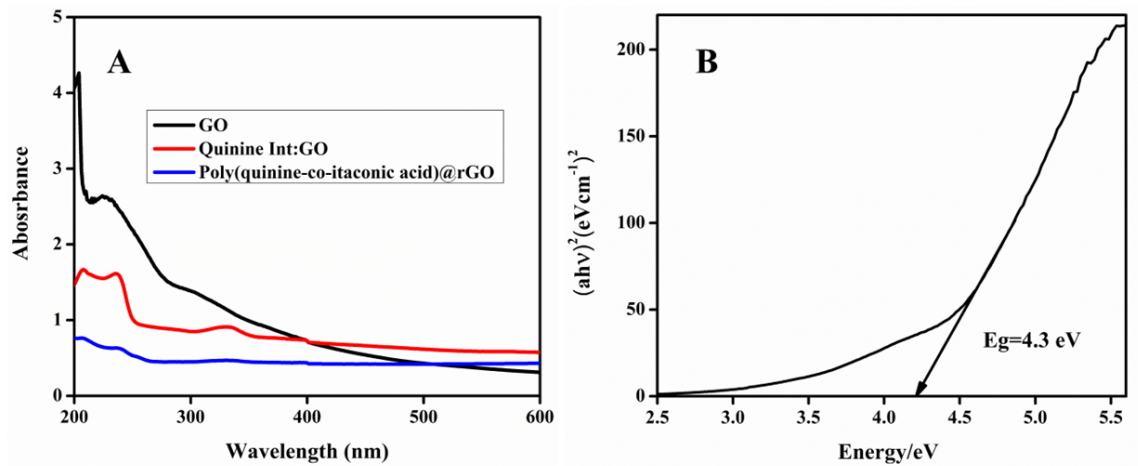

68

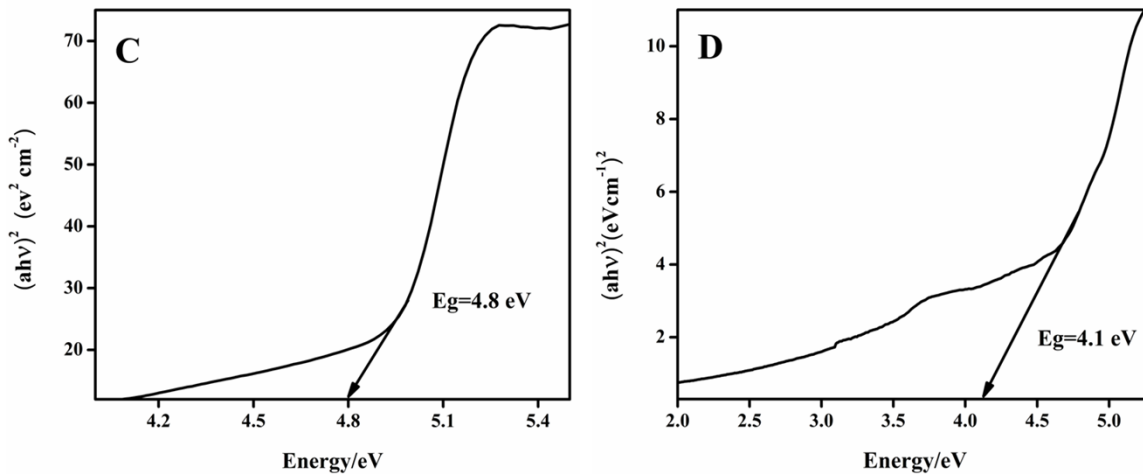

69

70 Figure S4: (A) UV-Vis spectra and (B,C,D) Tauc's plot of GO, Quinine Int. GO composite and  
 71 Poly(quinine-co-itaconic acid)@rGO composite

72

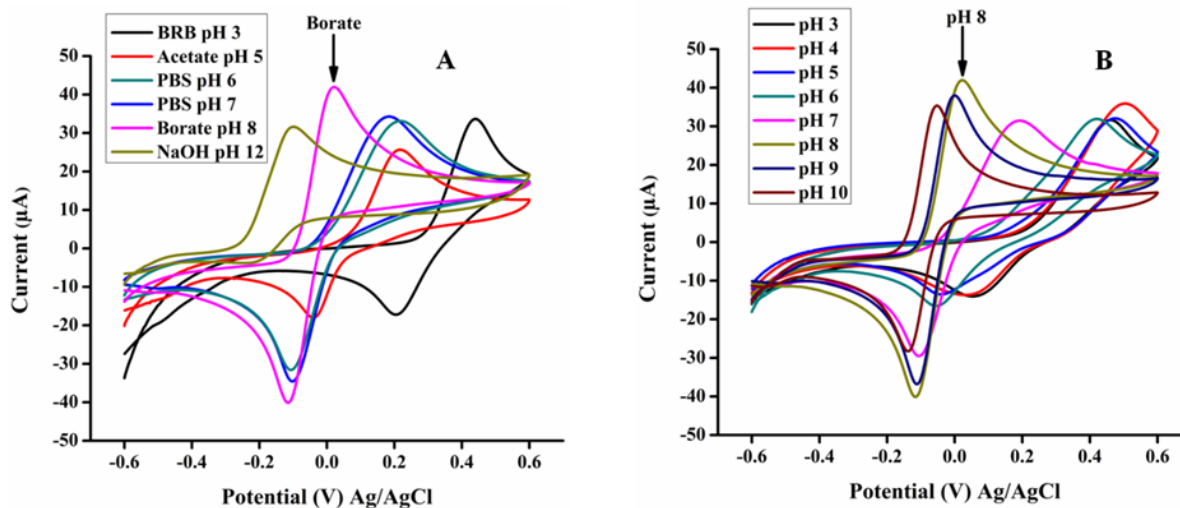

73

74 Figure S5: Figure 11 (A): CV redox response of HQ in various electrolytic medium and (B) pH  
 75 study of 10 μM HQ at scan rate of 50 mV/s using Poly (quinine-co-itaconic acid)@rGO/GCE in  
 76 borate buffer ranging from pH 3 to 10.

77

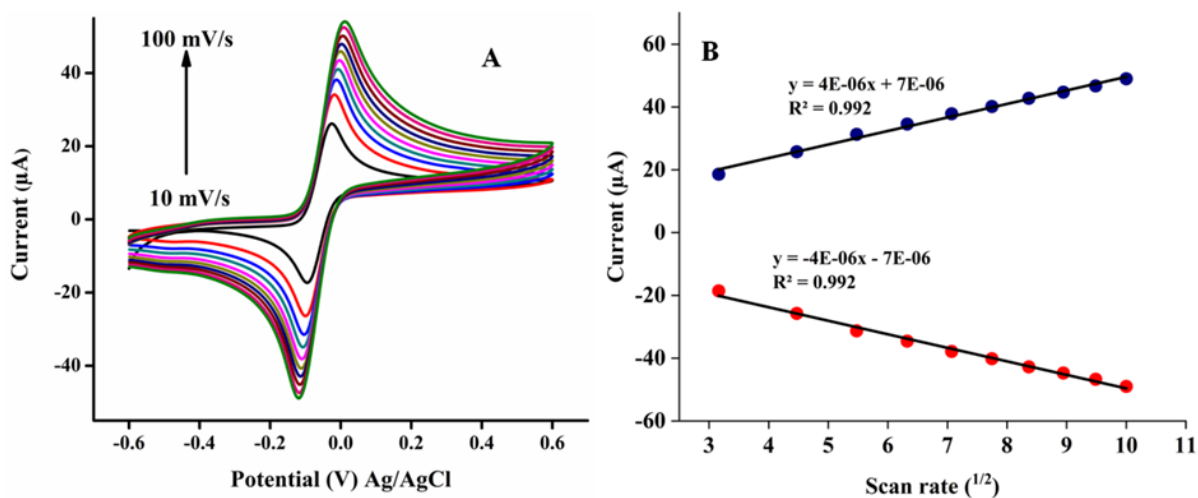

78

79 Figure S6: Effect of scan rate on redox peak current response of HQ, (B) plot of different scan  
 80 rate from 10 to 100 mV/s with regression equation ( $R^2 = 0.992$  for both anodic and cathodic peak  
 81 current response).

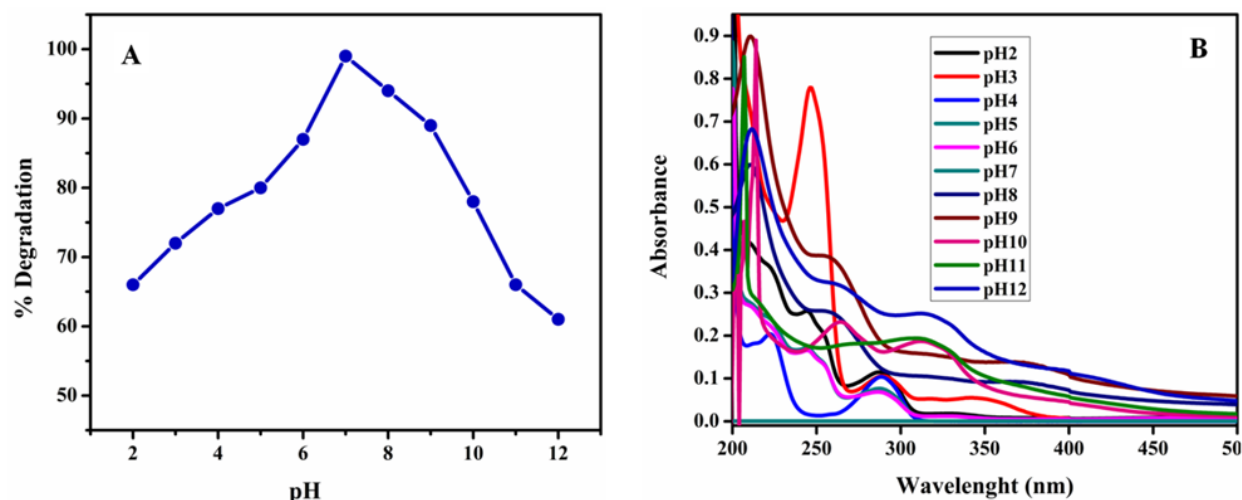

83

84 **Figure S7:** (A): % degradation of HQ at different pH and (B) UV-Vis spectra of photocatalytic  
 85 degradation of HQ using Poly (quinine-co-itaconic acid)@rGO composite under UV-irradiation.

86

87

88

89

90

- 91 1. D. T. Tran, *Materials Research Express*, 2020, **7**, 075501.
- 92 2. R. Abaszade, *Journal of Optoelectronic and Biomedical Materials*, 2022, **14**, 107-114.
- 93 3. A. T. Gidey and J. Y. Kim, *Journal of Materials Science: Materials in Electronics*, 2020, **31**,
- 94 12257-12268.
- 95 4. G. Sharma, A. Kumar, M. Naushad, B. Thakur, D.-V. N. Vo, B. Gao, A. A. Al-Kahtani and F. J.
- 96 Stadler, *Journal of Hazardous Materials*, 2021, **416**, 125714.
- 97 5. S. Gurunathan, J. Woong Han, E. Kim, D.-N. Kwon, J.-K. Park and J.-H. Kim, *Journal of*
- 98 *nanobiotechnology*, 2014, **12**, 1-16.
- 99 6. B. S. Bharat, T. Deepak and A. R. Babu, *Medical Engineering & Physics*, 2023, **121**, 104061.
- 100 7. D. N. Tran, S. Kabiri and D. Losic, *Carbon*, 2014, **76**, 193-202.
- 101 8. N. A. Marfur, N. F. Jaafar, M. H. Anuar and N. Zulkeffli, 2022.
- 102 9. F. Zheng, W.-L. Xu, H.-D. Jin, X.-T. Hao and K. P. Ghiggino, *RSC advances*, 2015, **5**, 89515-
- 103 89520.
- 104 10. A. Kumar, R. Kumar and G. Pandey, 2018.
- 105 11. F. Usman, J. O. Dennis, K. C. Seong, A. Y. Ahmed, F. Meriaudeau, O. B. Ayodele, A. R. Tobi,
- 106 A. A. S. Rabih and A. Yar, *Results in Physics*, 2019, **15**, 102690.
- 107 12. A. S. Khune, V. Padghan, R. Bongane, V. N. Narwade, B. Dole, N. N. Ingle, M.-L. Tsai, T.
- 108 Hianik and M. D. Shirsat, *Journal of Electronic Materials*, 2023, **52**, 8108-8123.

109
